## Magnetic Bead-Based Separation (MBS) of Pneumococcal Serotypes

Anna York<sup>1\*</sup>, Emily T. Huynh<sup>1</sup>, Sidiya Mbodj<sup>1</sup>, Devyn Yolda-Carr<sup>1</sup>, Maikel S. Hislop<sup>1,2</sup>,  
Haley Echlin<sup>3</sup>, Jason W. Rosch<sup>3</sup>, Daniel M. Weinberger<sup>1</sup>, Anne L. Wyllie<sup>1</sup>

<sup>1</sup>Department of Epidemiology of Microbial Diseases, Yale School of Public Health,  
New Haven, Connecticut, USA

<sup>2</sup>Department of Life Sciences and Chemistry, Utrecht University of Applied Sciences,  
Utrecht, Netherlands

<sup>3</sup>Department of Infectious Disease, St. Jude Children's Research Hospital, Memphis, TN,  
United States of America

\*Corresponding author: [anna.york@yale.edu](mailto:anna.york@yale.edu)

### SUMMARY

The separation of pneumococcal serotypes from a complex polymicrobial mixture may be required for different applications. For instance, a minority strain could be present at a low frequency in a clinical sample, making it difficult to identify and isolate by traditional culture-based methods. We therefore developed an assay to separate mixed pneumococcal samples using serotype-specific antiserum and a magnetic bead-based separation method. Using qPCR and colony counting methods, we first show that serotypes (12F, 23F, 3, 14, 19A and 15A) present at ~0.1% of a dual serotype mixture can be enriched to between 10% and 90% of the final sample. We demonstrate two applications for this method: extraction of a known pneumococcal serotype from saliva samples and efficient purification of capsule switch variants from experimental transformation experiments. Moreover, this method may have further laboratory or clinical applications when the selection of specific serotypes is required.

Key words: *Streptococcus pneumoniae*, pneumococcus, capsular polysaccharide, serotypes, transformation, capsule switch, saliva

### INTRODUCTION

*Streptococcus pneumoniae* (pneumococcus) is an opportunistic pathogen that resides asymptotically in the upper respiratory tract of many healthy adults and children worldwide. This asymptomatic colonization is a pre-requisite for the development of pneumococcal disease, including upper respiratory tract infections (such as otitis media), lower respiratory tract infections (such as pneumonia), and invasive pneumococcal disease (IPD) (such as meningitis and bacteremia). Pneumococcal disease often occurs in the very young, elderly, or immunocompromised<sup>1</sup>. Pneumococcus is a leading cause of lower respiratory disease, and contributed to 1,189,937 deaths globally in 2016.<sup>2</sup>

The capsular polysaccharide (CPS) is the outermost layer of encapsulated strains of *S. pneumoniae*, and more than 100 antigenically distinct serotypes have been identified.<sup>3</sup> Pneumococcal conjugate vaccines (PCV) are highly effective against pneumococcal disease but only cover up to 20 of these serotypes. While pneumococcal disease declined following the introduction of PCVs, a concomitant increase in disease caused by non-vaccine serotypes occurred. This emergence of non-vaccine serotypes in carriage and invasive disease is called

49 serotype replacement.<sup>4</sup> Serotype replacement occurs for two reasons, first the opening of a new  
50 niche in which existing strains expressing capsules not targeted by the vaccine can thrive.  
51 Second, vaccine-targeted strains can acquire the capsule biosynthesis cassette from a different  
52 serotype, allowing them to evade vaccine-induced immunity. Serotype switching occurs when  
53 the *cps* locus from one *S. pneumoniae* serotype (or related species) is transferred into the  
54 genetic backbone of another *S. pneumoniae* serotype by transformation.<sup>5</sup> Genetic exchange  
55 between two *S. pneumoniae* serotypes requires co-colonization of two or more serotypes.

56  
57 In addition to naturally occurring serotype switches,<sup>6–8</sup> researchers have been generating *cps*  
58 switch mutants in the lab for nearly 100 years. The first capsule switch experiments conducted  
59 by Griffith in 1928, were accomplished by mixing avirulent, unencapsulated pneumococci with  
60 virulent, but killed, encapsulated strains, and injecting this mixture into a mouse. The capsule-  
61 switched strains could then be isolated from the mouse.<sup>9</sup> More recently, generating *cps* switch  
62 mutants in the lab has been accomplished using various genetic cassettes.<sup>10,11</sup> These types of  
63 studies have permitted the generation of a number of capsule switch mutants, and this allows  
64 for detailed experimental evaluation of the relative importance of capsule and genetic  
65 background for different phenotypes.<sup>8,12,13</sup> Current methods for generating capsule-switched  
66 variants require the use of selectable markers, are labor intensive, and not easily scalable.  
67 Methods that allow for separation of multiple serotypes could eliminate the need for selection  
68 pressure altogether or could be used in combination to conduct higher throughput  
69 transformations.

70  
71 There is also a need to isolate individual pneumococcal strains from clinical samples.  
72 Nasopharyngeal swabs have long been considered the gold standard sample type for the  
73 detection of carriage of *S. pneumoniae*,<sup>14</sup> but recent studies have demonstrated utility for saliva  
74 to improve the detection of carriage in adults.<sup>15,16</sup> Whilst testing saliva improves the detection  
75 of pneumococci when using molecular methods (such as qPCR), it can be challenging for the  
76 isolation of live pneumococcal colonies due to the density and diversity of bacteria present in  
77 saliva. A method that enables the separation of pneumococci, in a serotype-specific manner,  
78 from other species present in saliva would be useful for clinical and laboratory studies alike.

79  
80 We developed a magnetic bead-based separation (MBS) method which requires no selection  
81 markers and can be used to extract live pneumococci, of a known serotype, from a mixture of  
82 pneumococci or from clinical samples containing other bacteria (such as saliva).

## 83 84 **METHODS**

85  
86 Figure 1 summarizes the MBS method; briefly, a mixture of serotypes is incubated with  
87 antisera pool(s) unique to the desired serotype, then following wash steps is incubated with  
88 secondary antibody conjugated to a magnetic bead. The cells are extracted using the automated  
89 Kingfisher Flex Purification System and the eluate plated on blood agar plates. Unless  
90 otherwise stated a blood agar plate (BAP) comprises Tryptic Soy Agar (TSA) II supplemented  
91 with 5% (v/v) defibrinated sheep blood, and are sometimes referred to as ‘plain plates’. BAPs  
92 containing the following concentrations of antibiotics/additives for selection were also used:  
93 0.018 µg/mL, 0.036 µg/mL, 0.18 µg/mL and 0.072 µg/mL penicillin, 10 µg/mL gentamycin,  
94 400 µg/mL kanamycin and 800 µg/mL streptomycin with 10% (w/v) sucrose. Unless otherwise  
95 stated all overnight incubations occur at 37°C and 5% CO<sub>2</sub>.

96

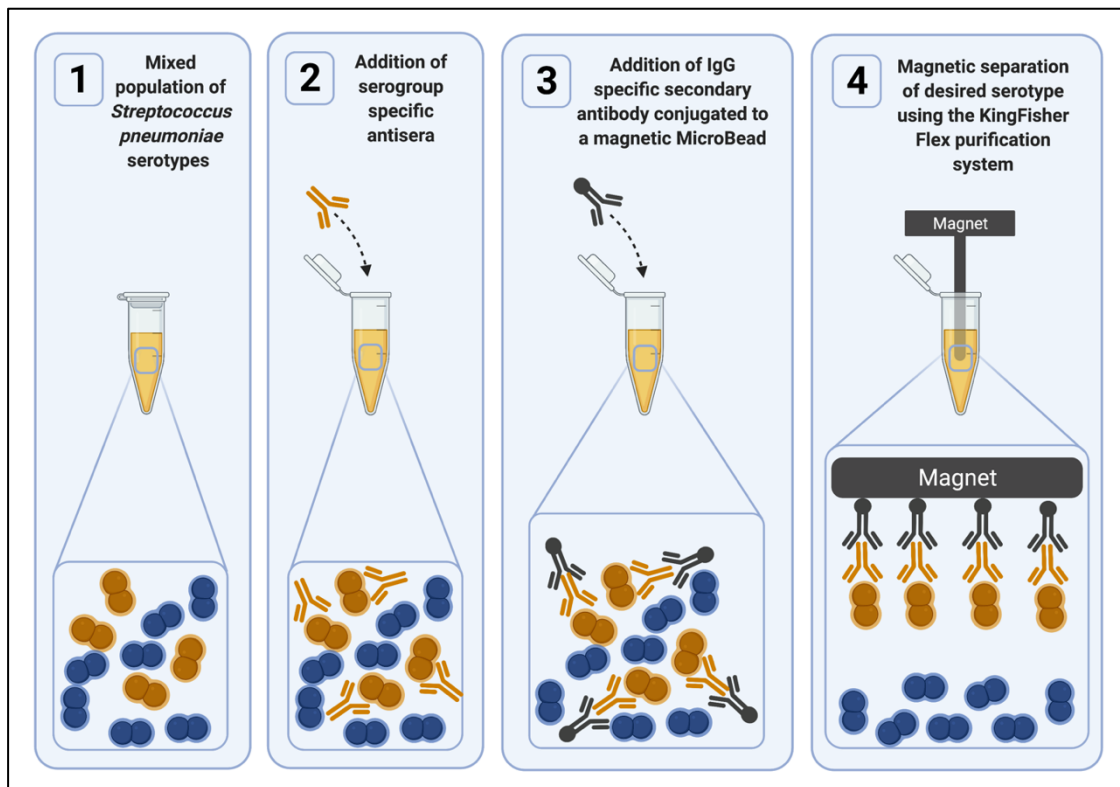

97  
98  
99  
100

Figure 1. An overview of the Magnetic Bead-based Separation (MBS) method. To a dual serotype mixture (1), antisera specific for the desired serotype are added (2). Following brief wash steps, IgG-specific secondary antibody conjugated to a magnetic bead is incubated (3) and finally the desired cells are extracted using the KingFisher Flex Purification System (4).

101

## 102 Magnetic Bead-Based Separation (MBS) Method

103 Approximately  $1 \times 10^4$  cells and  $1 \times 10^7$  cells from two different serogroups of *S. pneumoniae*  
104 were mixed together ( $\sim 0.1\%$  minority serotype). Cells were pelleted by centrifugation at 13,000  
105 rpm and resuspended in 450  $\mu$ l Buffer 1 (1x Phosphate Buffered Saline with 1% bovine serum  
106 albumin (BSA)). The resuspended sample was incubated at 4°C on a shaking platform at 150  
107 rpm for 1 hour. The two antisera pools specific for the minority serogroup were combined in a  
108 1:1 ratio and diluted 50-fold in Buffer 1. Next, 30  $\mu$ l of antisera mix was added to the sample  
109 and incubated at 4°C on a shaking platform at 150 rpm for 1 hour. The sample was centrifuged  
110 at 13,000 rpm for 5 mins, the supernatant was discarded, and the pellet was resuspended in 450  
111  $\mu$ l Buffer 1; this step was repeated again. Next, 20  $\mu$ l of Anti-Rabbit IgG MicroBeads (Miltenyi  
112 Biotech) was added, gently vortexed and incubated at 4°C on a shaking platform at 150 rpm  
113 for 30 minutes. The sample was extracted using the KingFisher™ Flex Purification System  
114 (ThermoFisher) with the protocol detailed in Table S3. The eluted sample was resuspended by  
115 pipetting the sample in the elution well 50-100 times before transferring it to a new Eppendorf  
116 tube. Following transfer, the sample was thoroughly mixed by vortexing a minimum of 10  
117 times for 5-10s with 5 sec intervals.

118

119 To minimize cell losses, when supernatant was removed from cell pellets, 50  $\mu$ l of supernatant  
120 was always left on top of the pellet. The specific rabbit antiserum pools (SSI Diagnostica,  
121 Hillerød, Denmark) used for the MBS method, and the SSI ImmuLex™ Pneumotest Pools used  
122 for serotyping are outlined in Table S1.

123

## 124 **Proof of concept and primary analysis**

125 To demonstrate proof of concept for the MBS method we used three pairs of six different  
126 serotypes where one serotype in each pair was penicillin resistant and the other penicillin  
127 sensitive. It is important to note that different penicillin sensitivity is not necessary for  
128 separation but was instead used to make the quantification of the efficiency of this method  
129 easier. The three pairs were 12F and 23F (Pair 1), 3 and 14 (Pair 2) and 19A and 15A (Pair 3).  
130 Serotype 3 exists as two distinct morphologies; small non-mucoid colony variant (SCV) and  
131 mucoid variant.<sup>17</sup> We therefore isolated SCV and mucoid variants and chose to work primarily  
132 with the SCV for three reasons; SCVs are easier to count, easier to isolate as single colonies  
133 (for serotyping) and less easy to distinguish from other serotypes based on morphology, thus  
134 reducing selection bias during the colony selection for serotyping. The MIC of each serotype  
135 was determined using penicillin E-strips, and then the exact concentration of penicillin for  
136 blood agar plates was determined experimentally by varying the penicillin concentration and  
137 plating out cells at known CFU/mL. The concentration of penicillin used in the blood agar  
138 plates was the concentration at which the resistant serotype grew equally well on a penicillin  
139 containing plate, as it did on a plain plate, whilst the susceptible serotype showed no growth  
140 on the penicillin containing plate but normal growth on a plain plate. For Pairs 1, 2 and 3, BAPs  
141 containing 0.018 µg/mL, 0.036 µg/mL and 0.18 µg/mL penicillin were used, respectively.

142  
143 For all three pairs, Sample R is when the penicillin resistant serotype is the minority species,  
144 and Sample S is when the penicillin sensitive serotype is the minority species. Samples were  
145 plated out onto BAPs with and without penicillin, at two stages in the protocol; immediately  
146 prior to the first incubation (PRE), and after extraction (POST). In all cases 5 µl of sample was  
147 serially diluted in 45 µl PBS, in triplicate. For samples where the minority strain was penicillin  
148 resistant, 20 µl of sample at a 10<sup>-1</sup> dilution was plated on penicillin plates, while 20 µl of sample  
149 at a 10<sup>-4</sup> dilution was plated on plain blood agar plates. In samples where the majority serotype  
150 was penicillin resistant, 20 µl of sample at a 10<sup>-4</sup> dilution was plated on both BAPs with and  
151 without penicillin. In addition to the diluted samples, 10 µl of undiluted sample at the PRE and  
152 POST stage, and the remaining volume (~40 µl) after elution was plated on BAPs, to provide  
153 DNA for qPCR experiments conducted to establish separation efficiency. In all cases 10 µl or  
154 20 µl samples were pipetted onto the BAP and the plate was then tilted to allow the sample to  
155 run down the length of the plate. The BAPs were incubated overnight.

## 156 **Secondary analyses**

157  
158 To establish if separation efficiency was similar for both mucoid (Muc) and single colony  
159 variants (SCV) of Serotype 3, two additional pairs; 23F and 3SCV (Pair 4), and 23F and 3Muc  
160 (Pair 5) were investigated. These experiments were conducted in duplicate, and efficiency  
161 assessed by colony counting and qPCR methods. Pair 4 and 5 used BAPs containing 0.072  
162 µg/mL penicillin.

163  
164 To investigate the effect of initial proportion of minority serotype on the efficiency of  
165 separation, 23F and 12F (Pair 1) were again used. The initial amount of majority serotype (12F)  
166 was kept constant at 1x10<sup>7</sup> CFUs, while the minority serotype (23F) was varied (5x10<sup>4</sup>, 1x10<sup>4</sup>,  
167 5x10<sup>3</sup> and 1x10<sup>3</sup>). These experiments were conducted once for each dilution, and efficiency  
168 was assessed by colony counting and qPCR methods.

169  
170 The experiments above were conducted using two pooled antisera that were specific for the  
171 minority serotype. We investigated whether a single pool of antisera could also be used. This  
172 is important because certain pairs of serotypes can only be distinguished by one pool. Serotype

173 pairs which could not be distinguished based on penicillin sensitivity (and therefore could not  
174 be assessed by colony counting methods), were used for this analysis, and for pairs which  
175 shared a common antisera pool, only the unique antisera was used. These experiments were  
176 conducted once for each condition, and efficiency was assessed by qPCR alone.

177

### 178 **Colony counting to quantify separation efficiency**

179 Colonies were counted and the mean colony number was determined, which was then used for  
180 downstream analysis. The following equations for Sample R and Sample S were used to  
181 determine the percentage of the minority serotype present at each time point.

182

#### 183 **Sample R Equation**

184

$$185 \quad \% \text{ minority} = \left( \frac{\# \text{colonies (pen plate)}}{\# \text{colonies (plain plate)}} \right) \times 100$$

186

187

188

#### 189 **Sample S Equation**

190

$$191 \quad \% \text{ minority} = \left( \frac{\# \text{colonies (plain plate)} - \# \text{colonies (pen plate)}}{\# \text{colonies (plain plate)}} \right) \times 100$$

192

193

### 194 **Serotyping of colonies to confirm separation efficiency**

195 Eight colonies were picked at random from the plain blood agar elution plates and expanded to  
196 create a lawn on 1/8<sup>th</sup> of a BAP and incubated overnight. The serotype of each lawn was  
197 confirmed by testing each of the four antisera pools specific to both the majority and the  
198 minority serotype in the pair, using ImmuLex™ Pneumotest (SSI Diagnostica) reagents.

199

### 200 **Real-Time qPCR to confirm separation efficiency**

201 Colonies/lawns from each sample, grown on BAP, were harvested into 200 µl PBS using a  
202 cotton swab and the DNA was extracted using a DNeasy Blood and Tissue Kit (QIAGEN) as  
203 per the manufacturers protocol. DNA concentration was measured using Qubit™ as per the  
204 manufacturers protocol. A no-template negative control was included for each primer pair used,  
205 <sup>18</sup> and a standard curve (positive control) was constructed using genomic DNA from each of  
206 the six serotypes under investigation. Each qPCR reaction was 25 µl total volume, consisting  
207 of iQ™ SYBR® Green Supermix (BioRad), 5 µl of template DNA and 200 nM of each primer.  
208 The real time qPCR was run on a BioRad CFX96™ Touch Real-Time qPCR System. The  
209 cycling conditions were 1 cycle of denaturation at 95°C for 10 minutes, followed by 40 cycles  
210 of 95°C for 15 seconds and 60°C for 1 minute for amplification, and a melt curve from 65°C  
211 to 95°C in increments of 0.5°C. For each sample, amplification with primer pairs from both  
212 the minority and majority serotype was conducted in duplicate, the mean of duplicates was  
213 used for downstream analysis. The concentration of each serotype in a sample was determined  
214 by comparing the C<sub>T</sub> value to the standard curve for the corresponding serotype.

215

### 216 **Applications for MBS method - Generating capsule-switch mutants by transformation**

217 To determine whether the MBS method could be used to improve capsule switching  
218 experiments (by reducing workload and scaling-up transformations), genomic DNA (gDNA)  
219 from four donor serotypes (12F, 23F, 35B, 11B) was transformed individually and as a mixed

220 sample into the recipient D39SΔcps::SweetJanus.<sup>11</sup> The mixed sample was processed with and  
221 without the use of the MBS method. An individual transformation of D39 gDNA into  
222 D39SΔcps::SweetJanus was included as a positive control.

223

224 With the exception of using Todd Hewitt supplemented with 0.5% Yeast Extract (THY) media  
225 for liquid cultures, gDNA was extracted as outlined previously.<sup>11</sup>

226

227 Frozen stocks of D39SΔcps::SweetJanus were inoculated onto BAP and incubated overnight.  
228 Cells harvested from the BAP were used to inoculate THY media to a starting OD<sub>620</sub> of 0.04  
229 AU, and were grown at 37°C and 5% CO<sub>2</sub> until late logarithmic phase (OD<sub>620</sub> ~0.80). For each  
230 of the five individual transformations, 1 mL of culture was transferred into a 1.5mL Eppendorf  
231 tube, 3 μg/mL of competence stimulating peptide 1 (CSP1) and 4 μg of the appropriate DNA  
232 was added. For the mixed transformation, 4 mL of culture was transferred to a 15 mL falcon  
233 tube, 3 μg/mL CSP1 and 4 μg of each of the four gDNA templates was added. Cells were  
234 incubated for three hours at 37°C. Subsequently, individual transformation and mixed  
235 transformation samples were positively selected for by plating on BAP supplemented with 800  
236 μg/mL streptomycin and 10% (w/v) sucrose (Strep/Suc plates), and incubated overnight.

237

238 For the five samples that underwent individual transformations, eight colonies each were  
239 selected and expanded onto new Strep/Suc plates and incubated overnight. These expanded  
240 samples were re-plated onto both Strep/Suc plates, as well as BAP supplemented with 400  
241 μg/mL kanamycin (Kan plates), for negative selection, and incubated overnight. Colonies that  
242 grew on Strep/Suc but not Kan plates were serotyped to confirm they have successfully gained  
243 the capsule.

244

245 For the mixed transformation sample, all colonies were harvested using a cotton swab and  
246 resuspended in 1.5 mL Brain Heart Infusion (BHI) media + 10% (v/v) glycerol. As a control,  
247 100 μl of the mixed sample was serially diluted to 10<sup>-6</sup>, then 100 μl of 10<sup>-4</sup>, 10<sup>-5</sup> and 10<sup>-6</sup>  
248 dilutions were plated on BAP, and incubated overnight. Following, 100 μl of the mixed sample  
249 was aliquoted into four 1.5 mL Eppendorf tubes, centrifuged at 13,000 rpm resuspended in 500  
250 μl Buffer 1 and processed through MBS using the appropriate antisera pool(s) for targeting the  
251 appropriate serotype. The elution was plated on BAP and incubated overnight. Thirty-two  
252 colonies were selected from the mixed sample that did not undergo MBS, and eight colonies  
253 were selected from each of the four samples that had undergone MBS. The serotype of all  
254 expanded colonies was determined using SSI latex agglutination.

255

### 256 **Applications for MBS method - Isolating pneumococci from saliva**

257 De-identified pneumococcus-negative saliva samples were obtained from healthy volunteers  
258 (< 30 years of age; IRB protocol number 2000029374). De-identified pneumococcus-positive  
259 saliva samples were obtained from healthy volunteers (> 60 years of age; IRB protocol number  
260 2000026100). The relationship between qPCR cycle threshold (C<sub>T</sub>) value and CFU/mL was  
261 determined using pneumococcus-negative saliva, spiked with pneumococci (serotype 19A) at  
262 a variety of known CFU/mL. The concentration of the 19A stock was determined to be 5x10<sup>9</sup>  
263 CFU/mL, which was then serially diluted 1:10 in pneumococcus-negative saliva. After two  
264 hours at room temperature, 100 μl of each sample was plated onto BAP supplemented with 10  
265 μg/mL gentamycin (Gent plates) and incubated overnight. The lawn of each culture-enriched  
266 saliva sample was harvested into 2100 μl BHI + 10% (v/v) glycerol using an L-shaped spreader.  
267 gDNA for each sample was extracted using a standard protocol (Table S4), all DNA templates  
268 were tested by qPCR for the pneumococcal gene *piaB* using Luna® Universal One-Step RT-

269 qPCR mix, 2.5  $\mu$ l template DNA and 200 nM of each primer and probe (Table S2) in a total  
270 reaction volume of 20  $\mu$ l. The cycling conditions were 1 cycle of denaturation at 95°C for 3  
271 minutes, followed by 40 cycles of 98°C for 15 seconds and 60°C for 30 seconds.  $C_T$  values  
272 were plotted against CFU/mL of 19A in the raw saliva sample (Figure S1).

273  
274 Using data from Figure S1 in combination with data from previous studies<sup>19</sup> we were able to  
275 determine suitable concentrations for spiked-saliva, that reflect levels commonly found in  
276 saliva obtained from the healthy individuals during carriage studies. Pneumococcus-negative  
277 saliva was spiked with pneumococci (serotype 19A) at varying concentrations ( $5 \times 10^4$ ,  $5 \times 10^3$ ,  
278  $5 \times 10^2$  and  $5 \times 10^1$  CFU/mL) and left at room temperature for 2 hours. Following, 100  $\mu$ l of each  
279 sample was plated onto Gent plates and incubated overnight. The lawn of the culture-enriched  
280 saliva was harvested into 2100  $\mu$ l BHI + 10% (v/v) glycerol.

281  
282 From each culture-enriched saliva sample, 10  $\mu$ l was added to 490  $\mu$ l Buffer 1, and cell  
283 separated using the MBS protocol, with the following modifications. The primary incubation  
284 step was conducted using SSI antisera (~16.8  $\mu$ g total protein) and SunFire Bio monoclonal  
285 antibody (mAb) (~16.8  $\mu$ g total protein) combined. The secondary incubation was conducted  
286 using ~48  $\mu$ g total protein of anti-mouse IgG MicroBeads (Miltenyi Biotech) to target the mAb  
287 only. As a negative control, culture-enriched saliva samples did not undergo MBS and were  
288 instead serially diluted to  $10^{-6}$ , the  $10^{-4}$ ,  $10^{-5}$  and  $10^{-6}$  dilutions were plated on BAPs and  
289 incubated overnight.

290  
291 Colonies that looked like pneumococci (small, grey, moist colonies with a green zone of alpha-  
292 hemolysis), were isolated and expanded onto new BAP: sixteen colonies from each sample  
293 (with and without cell separation) that contained  $5 \times 10^4$ ,  $5 \times 10^3$ ,  $5 \times 10^2$  CFU/mL of 19A in raw  
294 saliva samples, and 24 colonies from the sample (with and without cell separation) that  
295 contained  $5 \times 10^1$  CFU/mL of 19A in raw saliva. Each expanded colony was optochin tested to  
296 confirm whether it was pneumococcus (optochin sensitive) or another oral bacteria (optochin  
297 resistant). Where a ring of optochin sensitivity was observed but a second (contaminating)  
298 bacteria with optochin resistance was also present or, where satellite colonies of pneumococcus  
299 were present within the zone of inhibition, samples were considered ‘pneumococcal colonies’  
300 since pure pneumococci can be isolated from the contaminant.

## 301 302 **RESULTS**

303  
304 The MBS proof of concept experiments showed that for all six serotypes, the minority serotype  
305 was successfully enriched from ~0.1% starting percentage to between 13% (serotype 14) and  
306 90% (serotype 3) post MBS, corresponding to a 100-to-900-fold enrichment (Figure 2a). The  
307 final percentage of the minority varied between serotypes but was relatively consistent between  
308 the three replicates. There was generally good concordance in the estimated MBS efficiency as  
309 determined by the qPCR and colony counting (Figure 2b), however efficiency determined by  
310 colony counting seemed to be higher and lower than with qPCR for serotype 14 and 3,  
311 respectively. Eight colonies from each elution plate were selected at random and in every single  
312 case, minority serotype colonies were identified by serotyping (Table 1). This demonstrates  
313 that this technique can be used to recover a desired serotype from a dual mixture.

314

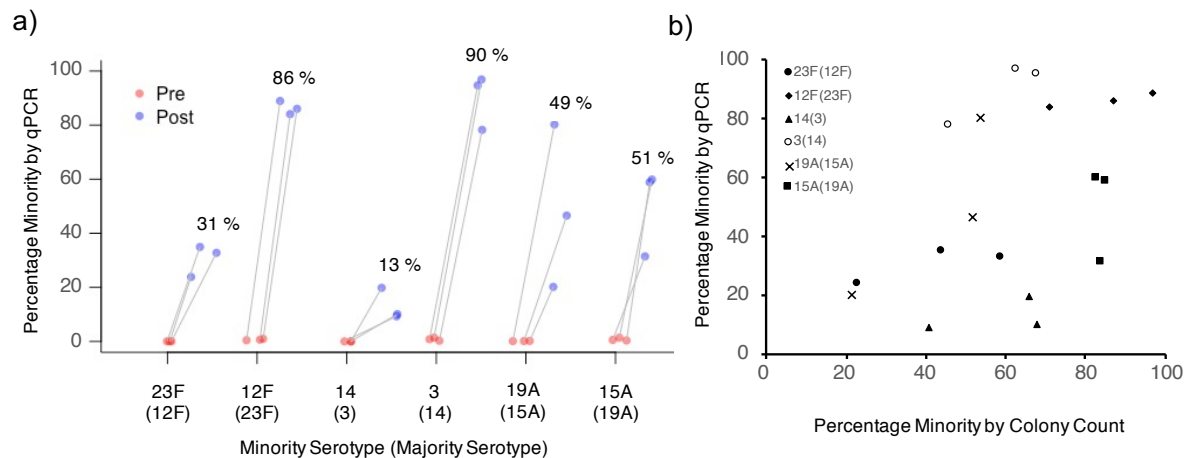

315  
 316 *Figure 2. Efficiency of minority strain enrichment using the MBS method on six serotypes. A) Percentage minority serotype*  
 317 *present prior to MBS (Pre) and after MBS (Post). The average percentage minority in the post sample is presented above the*  
 318 *data points, B) Percentage minority serotype present after MBS (Post) as determined by qPCR and colony counting.*  
 319 *Minority and majority serotypes are displayed in the legend in the following format, minority(majority). Results are shown*  
 320 *in triplicate for each of three serotype pairs where each serotype of the pair was tested as the minority serotype.*

321  
 322 A secondary analysis was conducted to identify whether serotype 3Muc was also enriched with  
 323 a similar efficiency as serotype 3SCV, and to gain insight into how separation efficiency varies  
 324 when the majority serotype of the pair is altered. MBS was conducted on Pair 4 (23F and 3SCV  
 325 and Pair 5 (23F and 3Muc). The results were compared to MBS results obtained previously for  
 326 enrichment of minority serotypes 23F or 3SCV when paired with another majority serotype  
 327 (namely serotype 12F and serotype 14 from Pair 1 and Pair 2, respectively). The percentage  
 328 enrichment for both 23F and 3 remained similar even when the majority serotype of the pair  
 329 was altered (Figure 3). Furthermore, it demonstrates that the MBS method permits successful  
 330 enrichment of both SCV and mucoid variants of serotype 3, and that the efficiency is similar  
 331 regardless of the morphology. In all cases minority serotype single colonies were isolated from  
 332 the elution plate by selection of single colonies and confirmed to be the desired serotype using  
 333 SSI latex agglutination (Table 1).  
 334

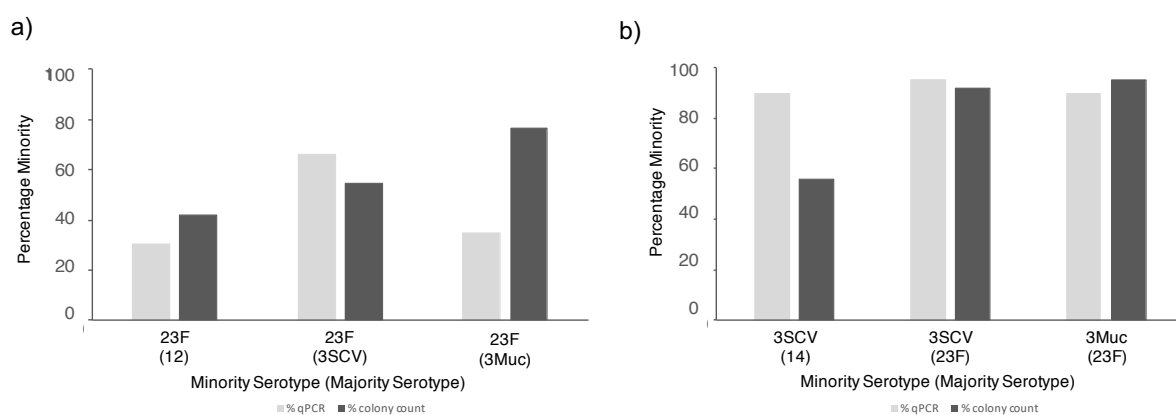

335  
 336 *Figure 3. Final percentage of minority serotype after MBS. Averages of triplicate results from Figure 1 are shown for 23F*  
 337 *(when with a majority of 12F) and 3 (when with a majority of 14). Averages of duplicate results were plotted for 23F (when*  
 338 *with a majority of 3SCV), 23F (when with a majority of 3Muc), 3SCV (when with a majority of 23F) and 3Muc (when with a*  
 339 *majority of 23F). Percentage minority from both colony counting and qPCR methods is shown.*

340



341 *Table 1. Total number of colonies on the plain blood agar elution plate (out of eight selected at random) that were positive*  
 342 *for the minority serotype by SSI latex agglutination. Positive results reported were those that tested positive with minority*  
 343 *serotype antisera and negative with majority serotype antisera.*

| Serotype Pairs    |                   | Number of colonies of the minority serotype following MBS<br>(from eight selected at random from plain blood agar plates) |      |      |
|-------------------|-------------------|---------------------------------------------------------------------------------------------------------------------------|------|------|
| Minority Serotype | Majority Serotype | Rep1                                                                                                                      | Rep2 | Rep3 |
| 23F               | 12F               | 5                                                                                                                         | 5    | 5    |
| 12F               | 23F               | 8                                                                                                                         | 6    | 5    |
| 14                | 3 (SCV)           | 4                                                                                                                         | 4    | 3    |
| 3 (SCV)           | 14                | 7                                                                                                                         | 6    | 6    |
| 19A               | 15A               | 1                                                                                                                         | 7    | 3    |
| 15A               | 19A               | 7                                                                                                                         | 6    | 5    |
| 23F               | 3(SCV)            | 4                                                                                                                         | 2    | N/A  |
| 3(SCV)            | 23F               | 6                                                                                                                         | 8    | N/A  |
| 23F               | 3(Muc)            | 6                                                                                                                         | 8    | N/A  |
| 3(Muc)            | 23F               | 5                                                                                                                         | 7    | N/A  |

344  
 345 The primary analysis specifically used serotype pairs that could be distinguished using two  
 346 unique pools of antisera. MBS was then tested on eight serotype pairs using only a single  
 347 antisera pool. A total of six antisera pools (H, P, B, E, R, H and Q) were tested and all were  
 348 able to successfully enrich a ~0.1% minority serotype to between 10% and 99% in the final  
 349 sample (Figure 4a).  
 350

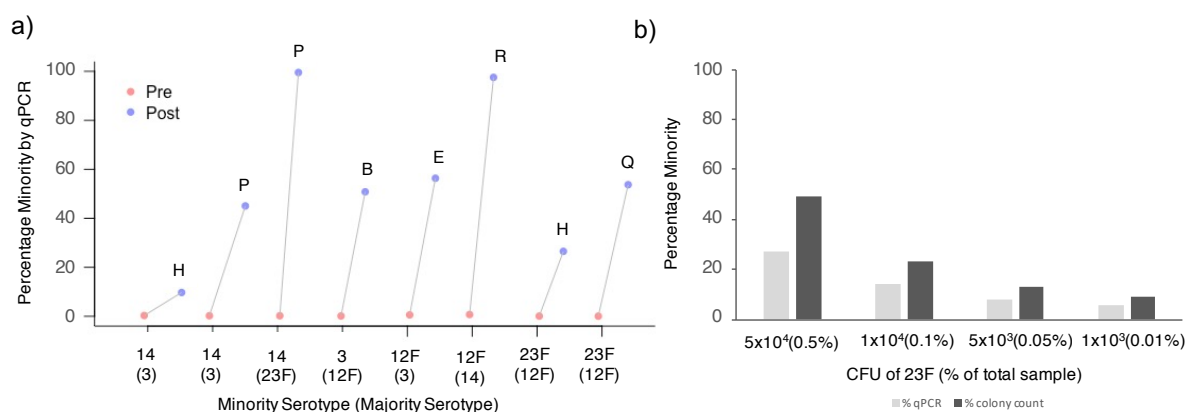

351  
 352 *Figure 4. Efficiency of minority enrichment using the MBS method on eight serotypes. A) Percentage minority serotype*  
 353 *present prior to MBS (Pre) and after MBS (Post), b) Percentage minority 23F present after MBS (Post) as determined by*  
 354 *qPCR and colony counting. Minority and majority serotypes are displayed in the following format, minority(majority).*  
 355 *Results shown are singlicate data points only.*

356 Additional analysis aimed to determine whether enrichment was constant at different %  
 357 minorities. The 23F and 12F pair were used with the majority serotype (12F) remaining  
 358 constant at 1x10<sup>7</sup> CFUs and the minority serotype (23F) at four different concentrations in the  
 359 initial sample. Enrichment of the minority serotype can be achieved even when the starting  
 360 percentage of a minority serotype is as low as 1x10<sup>3</sup> CFUs. However, as the initial % minority  
 361 decreases the percentage minority recovered following MBS also decreases. For initial samples  
 362 containing 5x10<sup>4</sup>, 1x10<sup>4</sup>, 5x10<sup>3</sup> and 1x10<sup>3</sup> CFU's of minority serotype 23F, the corresponding  
 363 percentage of 23F present in the final samples were 27%, 14%, 8% and 6% respectively as  
 364 determined by qPCR, or 49%, 23%, 13% and 9% respectively as determined by colony  
 365 counting (Figure 4b).

366

367 In order to separate serogroups that share reactivity to one antiserum pool, the MBS method  
368 should be used with only a single antiserum pool. We therefore investigated outcomes when  
369 using one or two antisera Pools and compared the efficiency of antisera pools in the presence  
370 of different majority serotypes. MBS of serotype 14 from a majority serotype 3, using both  
371 antisera Pool H and Pool P, resulted in the final sample containing ~13% of serotype 14.  
372 However, use of only Pool H or Pool P, at an equal final volume to the combined pools, resulted  
373 in serotype 14 being 10% and 45% of the final samples respectively. Therefore, in this example,  
374 Pool P alone achieves the greatest efficiency of MBS, but in the absence of knowing which  
375 antisera is more efficient, and if the serotype pairs permit dual use, it would be prudent to  
376 combine both antisera pools. Furthermore, we confirm that the overall efficiency of enrichment  
377 achieved by any antisera pool, is not only dependent upon the minority serotype alone, but also  
378 the majority serotype. The final percentage of serotype 14 following MBS (using Pool P) from  
379 a majority serotype 23F, is 99%, more than double the percentage of serotype 14 present  
380 following MBS (using Pool P) from a majority serotype 3.

381

### 382 **Generating capsule-switch mutants by transformation**

383 For transformations conducted individually, the positive control (D39 gDNA) was successfully  
384 transformed into D39SΔcps::SweetJanus at the cps locus, with 8/8 colonies serotyping as  
385 serotype 2. gDNA from serotype 23F and serotype 35B was also found to transform into  
386 D39SΔcps::SweetJanus at the cps locus, with 7/8 and 8/8 colonies serotyping as 23F and 35B  
387 respectively. Conversely, 0/8 colonies were serotyped as 12F or 11B for these transformations,  
388 suggesting that transformation may not have occurred or may have occurred at very low  
389 efficiency (Table 2).

390

391 *Table 2. Number of positive transformations (per 8 colonies) when individual transformations are conducted using the*  
392 *standard transformation procedure and selection methods.*

| Serotype | Individual Transformations<br># of transformants |
|----------|--------------------------------------------------|
| D39      | 8/8                                              |
| 12F      | 0/8                                              |
| 23F      | 7/8                                              |
| 35B      | 8/8                                              |
| 11B      | 0/8                                              |

393

394 Transformations conducted in higher throughput (i.e. gDNA from 4 serotypes combined) show  
395 that in the absence of cell separation, even when gDNA samples are mixed, it is possible to  
396 isolate transformation to 23F and 35B with 9/32 and 11/32 colonized serotyping as these  
397 serotypes, respectively. Similarly, to the results seen in the individual transformations,  
398 transformants of 12F or 11B were not identified (0/32). The mixed transformations that were  
399 subsequently cell separated with MBS to enrich for the desired serotype showed that 23F, 35B  
400 and 11B were successfully transformed, with 8/8, 5/8 and 7/8 colonies identified to be 23F,  
401 35B and 11B, respectively (Table 3). This confirms that 11B is able to transform into  
402 D39SΔcps::SweetJanus at the cps locus but this likely occurs at a lower efficiency, or that  
403 acquisition of the cps locus requires additional non-cps recombination from other serotypes in  
404 the mix. For serotype 12, colonies were observed on the BAP following MBS, however 0/8  
405 were identified to be 12F transformants, therefore this transformation may only occur at very  
406 low frequencies, under very specific conditions, or not at all. Of the 8 colonies selected from  
407 the cell separation enriching for 12F, 6/8 were serotype 23F, 1/8 were serotype 11B and only

408 1/8 was untransformed. For serotype 35B, 1/3 was serotype 23F and 2/3 were untransformed.  
 409 For serotype 11B, 1/8 was serotype 23F. The presence of these contaminating serotypes  
 410 suggests that the antisera/antibodies used in MBS have some non-specific cross-reactivity.

411  
 412 *Table 3. Number of positive transformations for each serotype from a mixed transformation containing gDNA of 12F, 23F,*  
 413 *35B and 11B, in the presence of cell separation (8 colonies picked per sample) and in the absence of cell separation picked*  
 414 *(total of 32 colonies picked).*

| Serotype | Control (no cell separation)<br># of transformants | Cell Separation<br># of transformants |
|----------|----------------------------------------------------|---------------------------------------|
| 12F      | 0/32                                               | 0/8                                   |
| 23F      | 9/32                                               | 8/8                                   |
| 35B      | 11/32                                              | 5/8                                   |
| 11B      | 0/32                                               | 7/8                                   |

415  
 416 **Isolating pneumococci from saliva**

417 To determine if the MBS method could be used to enrich for a known serotype in  
 418 pneumococcus-positive saliva, we spiked two saliva samples (A and B) which tested qPCR-  
 419 negative for pneumococcal genes *piaB* and *lytA*, with varying concentrations of serotype 19A  
 420 and compared the success of identifying pneumococcal colonies in the presence and absence  
 421 of MBS (Table 4). For both saliva A and saliva B, at all concentrations of 19A, the MBS  
 422 method resulted in equal or improved isolation of pneumococcal colonies. In saliva A, the MBS  
 423 method was still able to enrich for pneumococcus when the concentration of 19A was  $5 \times 10^1$   
 424 CFU/mL in raw saliva, however for Saliva B the MBS method was only successful at a 19A  
 425 concentration of  $5 \times 10^3$  CFU/mL in raw saliva. The sensitivity of this assay is therefore  
 426 dependent upon not only the concentration of pneumococci in the sample but also the  
 427 composition of saliva itself, and may vary from sample to sample. The MBS method was then  
 428 tested on a saliva sample that had tested qPCR-positive for serotype 15B/C but from which we  
 429 had been unable to isolate pneumococcus using the standard culture-based dilution method.<sup>20</sup>  
 430 Here, the MBS method successfully enriched for pneumococcus in the sample, and of the 32  
 431 colonies selected, 29 were confirmed to be pneumococcus.

432  
 433 *Table 4. Isolation of optochin-sensitive pneumococcal colonies using the standard dilution method compared to the MBS*  
 434 *method. Two saliva samples (A and B) were spiked with four concentrations of serotype 19A. Pure pneumococcal colonies*  
 435 *were identified by a zone of inhibition around the optochin disk, any colonies that were mixed colonies (i.e. those with a zone*  
 436 *of inhibition but some secondary growth (a non-pneumococcal contaminant) growing within the zone of inhibition, or, had*  
 437 *satellite colonies appearing within the zone of inhibition) were considered to be successful isolation of pneumococcus).*

| CFU/mL of <i>S. pneumoniae</i><br>19A | # of 19A colonies identified in<br>Saliva A |                                | # of 19A colonies identified in<br>Saliva B |                                |
|---------------------------------------|---------------------------------------------|--------------------------------|---------------------------------------------|--------------------------------|
|                                       | With MBS<br>method                          | Standard<br>dilution<br>method | With MBS<br>method                          | Standard<br>dilution<br>method |
| $5 \times 10^4$                       | 15/16                                       | 15/16                          | 15/16                                       | 1/16                           |
| $5 \times 10^3$                       | 15/16                                       | 5/16                           | 5/16                                        | 0/16                           |
| $5 \times 10^2$                       | 16/16                                       | 2/16                           | 0/16                                        | 0/16                           |
| $5 \times 10^1$                       | 6/24                                        | 0/24                           | 0/24                                        | 0/24                           |

438

## 439 DISCUSSION

440 We developed the MBS method that can enrich for a desired serotype from a mixed-serotype  
441 sample in a laboratory setting. Enrichment using the MBS method was demonstrated for six  
442 serotypes (23F, 12F, 3, 14, 15A and 19A) including two serotypes with more unique capsules  
443 (serotype 3 and serotype 14). We were able to demonstrate two use cases for this method:  
444 separation of capsule switch mutants (from mixed transformation experiments) and,  
445 enrichment of pneumococcus from saliva samples.

446  
447 In the primary analysis used to develop the MBS method, we show that all six of the minority  
448 serotypes investigated (23F, 12F, 14, 3, 19A and 15A) can be successfully enriched from  
449 ~0.1% of an initial mixed serotype sample to up between 13% and 90% in the final sample.  
450 The inclusion of Serotype 3 (which exists as single colony and mucoid variants) and serotype  
451 14 (which has an uncharged capsule) in this panel, showed that this method is suitable for  
452 serotypes with more unique capsules. Two methods; colony counting, and qPCR were  
453 employed in order to assess efficiency of the MBS method. The estimates from both methods  
454 were broadly concurrent but there are a few examples where the efficiency estimates do differ.  
455 This may be explained by the formation of varying chain lengths in pneumococcus, such that  
456 if the two serotypes in a pair form vastly different length chains, the estimations of efficiency  
457 may be biased. A serotype that readily forms chains would result in an underestimation of its  
458 presence in the sample using the colony counting method, but qPCR would provide a more  
459 accurate estimation. Despite some differences in efficiency estimates between colony counting  
460 and qPCR methods, we were able to successfully isolate minority serotype colonies post MBS  
461 in all cases. This demonstrates a tangible utility for this method in the laboratory setting. When  
462 separating a mixture of cells only a small number of colonies must be isolated to identify the  
463 desired serotype. This method therefore allows for the easy recovery of serotype-specific *S.*  
464 *pneumoniae* isolates.

465  
466 In the secondary supporting analysis, we compared how enrichment of a minority serotype  
467 varied when in the presence of different majority serotypes. A minority serotype 23F was  
468 paired with a majority serotype of either 12F or 3, and minority serotype 3 was paired with a  
469 majority serotype of either 14 or 23F. With minority 23F, some variation in efficiency of MBS  
470 was noted when the majority serotype was changed, however for minority serotype 3, the  
471 enrichment efficiency remained very similar despite the change in majority serotype pair. This  
472 suggests that the serotype with which the minority is mixed may have some impact on the  
473 efficiency of MBS, but it is likely primarily determined by the avidity of the antisera for the  
474 desired serotype. Unlike the majority of pneumococcal serotypes, serotype 3 utilizes the  
475 synthase-dependent pathway for CPS production, resulting in non-covalently bound CPS  
476 which can be released from the glycolipids or synthase.<sup>21</sup> The CPS of serotype 3 is not  
477 covalently linked to the peptidoglycan and can be released,<sup>22</sup> which leads to a reduction in the  
478 protective effect of anti-Type 3 CPS antibodies induced by the PCV13,<sup>23</sup> we were therefore  
479 surprised to find that the MBS method can successfully extract serotype 3 from a mixed sample.  
480 This success may be explained by the fact that the cells are not actively growing and likely  
481 therefore not releasing CPS into the environment. Furthermore, it is intriguing but reassuring  
482 that the efficiency of enrichment between mucoid and SCV serotype 3 is very similar; the MBS  
483 method can be successfully used on serotype 3 samples, which are of particular interest due to  
484 the reduced effectiveness of PCV13 on serotype 3 IPD.<sup>24-26</sup>

485  
486 We demonstrate that good separation can be achieved with only one unique antiserum, meaning  
487 that serotypes with cross-reactivity to one antiserum can still be separated using this method.  
488 As expected, we demonstrate that the efficiency of enrichment achieved by each of the two

489 antisera pools is not equal and therefore, depending on the desired serotype one antisera may  
490 be preferred over another. Furthermore, enrichment of a serotype can occur even when a  
491 serotype is present at only 0.01% of the total sample ( $1 \times 10^3$  minority serotype with  $1 \times 10^7$   
492 majority serotype).

493  
494 A key limitation of the MBS method in general, is that due to cross-reactivity within  
495 serogroups, SSI antisera Pools can only be used to separate *S. pneumoniae* serotypes belonging  
496 to different serogroups. However, use of type-specific antisera or a mAb instead of pooled  
497 antisera would circumvent this limitation. Another limitation is the total proportion of minority  
498 cells that can be recovered. While enrichment from 0.1% up to >10% has been demonstrated,  
499 it is worth noting that only a small proportion (~1%) of the total minority cells present in the  
500 initial mixture are successfully extracted. This may be overcome by increasing antibody  
501 incubation periods or antibody concentration to increase binding capacity.

502  
503 Having optimized the MBS method, we evaluated its potential for laboratory applications. The  
504 MBS method allows for higher throughput generation of capsule-switch variants, by combining  
505 the method with the existing techniques, such that gDNA from multiple donor serotypes can  
506 be transformed into a recipient serotype in a single mixed reaction. After initial selection for  
507 transformants on selection media, the MBS method can be used to separate out the individual  
508 transformants in a serotype-specific manner. Mixed transformations would permit higher  
509 throughput generation of capsule-swapped variants, the potential to determine comparative  
510 efficiency and a significant reduction in BAP usage and labor intensity. However, in the  
511 absence of MBS, whilst isolation of different serotypes is comparable to that observed in  
512 individual transformations, the benefits are offset by the lengthy and time-consuming process  
513 of serotype screening each isolate by latex agglutination. Therefore, to harness the true benefit  
514 of mixed transformations a simple and easy technique to select for different serotypes is  
515 required. The MBS method was used to isolate multiple serotypes, from a mixed sample of  
516 four serotypes. The MBS method outperformed the individual transformations and the mixed  
517 transformation (without MBS), by successfully isolating an additional serotype (11B) which  
518 was not isolated using the other methods. This suggests that the MBS method may be  
519 particularly useful to enrich for serotypes which transform with low efficiency. The MBS  
520 technique was not 100% specific, and a small amount of cross-reactivity was observed,  
521 however, since each sample is enriched for the desired serotype, and the serotype of each  
522 colony is confirmed by latex agglutination, these contaminants are of little concern for this  
523 particular application.

524  
525 We also show that the MBS method can be modified to successfully enrich for pneumococci  
526 of a known serotype from saliva samples. Enrichment is possible even in saliva samples where  
527 pneumococci is present at very low concentrations ( $5 \times 10^1$  CFU/mL), for which isolation of  
528 pneumococci using standard methods is typically very challenging. This permits easy  
529 identification and isolation of pneumococci present in saliva at concentrations too low to detect  
530 using standard dilution and plating methods. The use of SSI antisera alone on a polymicrobial  
531 sample such as saliva was problematic due to antisera reactivity with non-pneumococcal  
532 bacteria present in saliva. In general, we found that the SSI antisera outperformed mAbs in  
533 terms of total number of pneumococcal colonies isolated, we hypothesize that this is due to the  
534 increased avidity of antisera (presence of IgA, IgM) which agglutinates pneumococci  
535 increasing the overall yield during MBS. Therefore, to take advantage of the increased avidity  
536 of antisera and simultaneously the high specificity of mAbs, we combined both in the primary  
537 incubation step, but only targeted the mAb in the secondary antibody step. While the elution  
538 from saliva samples was not 100% pure pneumococci, contaminating non-pneumococcal

539 bacteria was reduced, and identification and selection of single pneumococcal colonies was  
540 improved when compared to the standard dilution and plating method. The enrichment  
541 observed varies depending on concentration of pneumococci present in the sample, but also on  
542 the saliva composition itself. The composition of bacterial community in saliva varies between  
543 different age groups<sup>27</sup> and so the success of the MBS method will likely vary accordingly.  
544 Since the MBS method can work on saliva containing very low concentrations of pneumococci  
545 it may be particularly useful for the isolation of minority serotypes in samples obtained from  
546 multiply colonized individuals. Previous research shows that 52% of Dutch primary school  
547 children tested positive for multiple pneumococcal serotypes,<sup>19</sup> however, conventional  
548 serotyping methods often result in an underestimation of multiply colonized individuals.<sup>28</sup>  
549 Detection of multiple serotypes is possible using serologic, biochemical (Mass Spectroscopy  
550 and nuclear Magnetic Resonance), and genotypic (sequencing, qPCR and microarrays)  
551 methods, however, until now, attempting to isolate minority serotypes by conventional  
552 methods (single colony selection) has been laborious and time consuming.<sup>21</sup>

553

## 554 **CONCLUSION**

555 The MBS method allows for the successful enrichment of a minority serotype from a dual  
556 sample containing two *S. pneumoniae* serotypes belonging to different serogroups. Using this  
557 method, an initial sample containing 0.01-0.1% of a desired serotype, can be enriched to up to  
558 90% in the final sample. Enrichment to between 10 and 90% was demonstrated for six minority  
559 serotypes, and half of the commercially available antisera pools (Pools B, E, H, P, Q, R and S)  
560 were tested. We demonstrate two different applications for this technique: separating capsule-  
561 switch variants from mixed transformation experiments and enriching for pneumococci of a  
562 known serotype from saliva. The MBS technique can be used successfully to enrich for  
563 serotypes which are present at very low-levels in both mixed cultures and more complex  
564 polymicrobial sample types (such as saliva), making it a versatile and important technique for  
565 a multitude of applications.

566

## 567 **AUTHOR CONTRIBUTIONS**

568 Conceptualization, DMW and ALW; Methodology, AY, DMW and ALW; Investigation,  
569 AY, EH, SM, MH, DYC, HE, JR; Analysis, AY and DW; Writing – initial draft, AY; Writing  
570 – Review & Editing, DMW, ALW and DYC; Supervision, ALW, DMW, JR.

571

## 572 **AUTHOR DECLARATION**

573 DMW has received consulting fees from Pfizer, Merck, GSK, Affinivax, and Matrivax and is  
574 PI on research grants from Pfizer and Merck to Yale. ALW has received consulting fees from  
575 Pfizer and is PI on research grants from Pfizer to Yale. The other authors declare no conflict  
576 of interest.

577

## 578 **FUNDING**

579 This work was supported by R01AI123208 from NIAID/NIH (DMW). The content is solely  
580 the responsibility of the authors and does not necessarily represent the official views of the  
581 National Institutes of Health.

582 **Supplemental Information**

583  
584  
585

*Table S1. Serotypes and corresponding antisera pools used for MBS (rabbit antiserum; SSI Diagnostica, Hillerød, Denmark) and for serotyping (ImmuLex™ Pneumotest; SSI Diagnostica).*

| Serotype | Pooled Antisera for Neufeld    | ImmuLex™ Pneumococcus Antisera |
|----------|--------------------------------|--------------------------------|
| 12F      | Pool E #16733<br>Pool R #16741 | Pool E #52394<br>Pool R #52401 |
| 23F      | Pool H #16736<br>Pool Q #16740 | Pool H #52397<br>Pool Q #52400 |
| 3        | Pool B #16728<br>Pool R #16741 | Pool B #52391<br>Pool R #52401 |
| 14       | Pool P #16739<br>Pool H #16736 | Pool P #52399<br>Pool H #52397 |
| 19A      | Pool B #16728<br>Pool P #16739 | Pool B #52391<br>Pool P #52399 |
| 15A      | Pool H #16736<br>Pool S #16742 | Pool H #52397<br>Pool S #52402 |
| 2 (D39)  | Pool A #16725<br>Pool T #16743 | Pool A #52390<br>Pool T #52403 |
| 35B      | Pool G #16735                  | Pool G #52396                  |
| 11B      | Pool D #16731<br>Pool T #16743 | Pool D #52393<br>Pool T #52403 |

586  
587  
588

*Table S2. PiaB qPCR primers and probes.*

| Primer/Probe Name | Primer Sequence               |
|-------------------|-------------------------------|
| PiaB Forward      | CATTGGTGGCTTAGTAAGTGCAA       |
| PiaB Reverse      | TACTAACACAAGTTCCTGATAAGGCAAGT |
| PiaB Probe        | TGTAAGCGGAAAAGCAGGCCTTACCC    |

589  
590  
591

*Table S3. KingFisher Flex MBS Protocol*

|                       |
|-----------------------|
| <b>Pick up tips</b>   |
| 96DW tip comb         |
| <b>Collect Beads</b>  |
| Count 2 seconds 5     |
| <b>Mix</b>            |
| Release Beads         |
| Medium mix 0:01:00min |
| Count 3 seconds 1     |
| <b>Release Beads</b>  |
| Fast 00:00:05         |
| <b>Leave</b>          |
| Leave Plate           |

592  
593  
594

*Table S4. KingFisher Flex DNA extraction protocol*

|                               |
|-------------------------------|
| <b>Pick up tips</b>           |
| 96DW tip comb                 |
| <b>Predigest</b>              |
| 56°C                          |
| Preheat on                    |
| Mixing medium 0:10:00 minutes |
| <b>Heat kill pk 95 °C</b>     |

|                                                                |
|----------------------------------------------------------------|
| Preheat off                                                    |
| Mixing medium 0:10:00 minutes                                  |
| <b>Initial Mixing</b>                                          |
| Release bead 0:00:00                                           |
| Slow mix 0:01:00min                                            |
| Medium mix 0:04:00min                                          |
| Loop1                                                          |
| <b>Add Proteinase K and Binding</b>                            |
| Add 10 µl pro k, 25 µl binding beads and 530 µl binding buffer |
| <b>PK Digest</b>                                               |
| Release bead 0:00:00                                           |
| Preheat on 65°C                                                |
| Mix Fast 0:15:00 min                                           |
| Collect beads 5 count 1 second                                 |
| Collect beads: Count 5 time 0                                  |
| <b>Wash 1</b>                                                  |
| Release beads 20 second bottom mix                             |
| Mixing 0:00:10 bottom mix                                      |
| 0:00:10 Fast mix                                               |
| Loop 3 times                                                   |
| Collect beads: Count 5                                         |
| <b>Wash 2</b>                                                  |
| Release beads                                                  |
| 0:00:20 FAST                                                   |
| Mixing 0:00:10 bottom mix                                      |
| 0:00:10 Fast mix                                               |
| Loop 2 times                                                   |
| Collect beads: 4 count 1 second                                |
| <b>Wash 3</b>                                                  |
| Release beads                                                  |
| 0:00:00                                                        |
| Mix                                                            |
| 0:00:30 Fast                                                   |
| Collect beads: Count 5 seconds 0                               |
| <b>Dry</b>                                                     |
| 0:02:00 Dry type (outside well)                                |
| <b>Elution 1</b>                                               |
| Release Beads                                                  |
| 0:00:00                                                        |
| Heating and Cooling                                            |
| Preheat ON                                                     |
| 75°C                                                           |
| Mixing 0:00:15 bottom mix                                      |
| 0:00:45 Medium mix                                             |
| Loop 6 times                                                   |
| Collect Beads                                                  |
| Count 1 seconds 0                                              |
| <b>Final Beads</b>                                             |
| Mixing                                                         |
| 0:02:00 slow                                                   |
| <b>Elution 2</b>                                               |
| Release Beads                                                  |
| 0:00:00                                                        |
| Heating and Cooling                                            |
| Preheat ON                                                     |
| 75°C                                                           |
| Mixing 0:00:15 bottom mix                                      |
| 0:00:45 Medium mix                                             |
| Loop 6 times                                                   |
| Collect Beads                                                  |
| Count 1 seconds 0                                              |
| <b>Final Beads</b>                                             |
| Mixing                                                         |
| 0:02:00 slow                                                   |
| <b>Leave Tip</b>                                               |
| Tip Plate                                                      |
| <b>HOLD Temp</b>                                               |
| Elution Plate 1                                                |
| 10°C                                                           |

595  
596  
597  
598



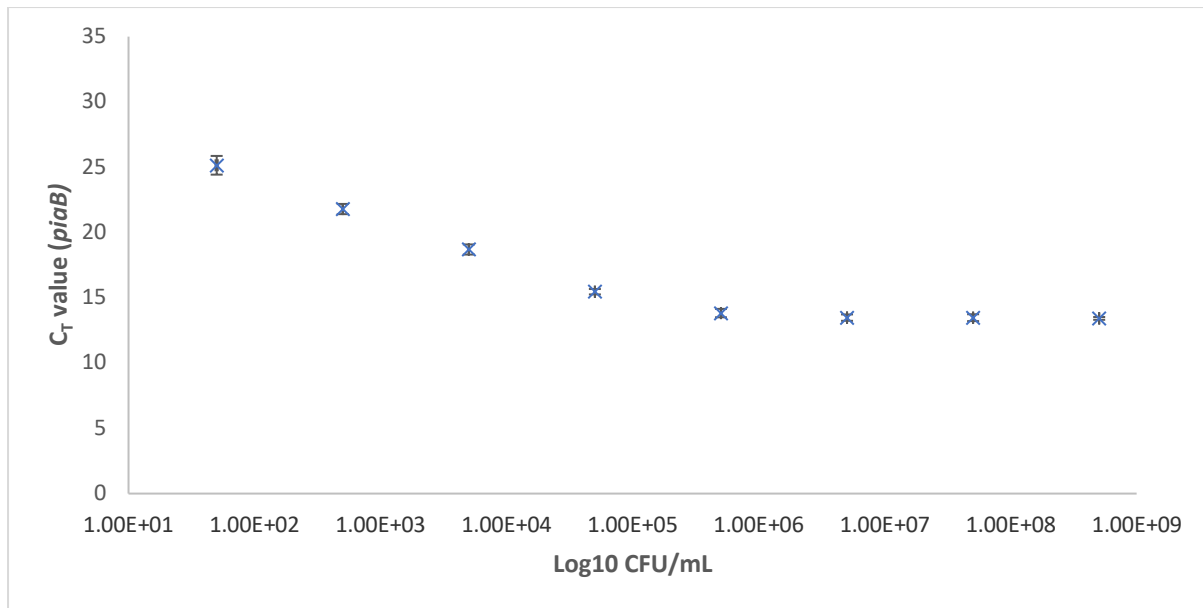

599  
600  
601  
602  
603

Figure S1. Detection of pneumococcus gene *piaB* ( $C_T$  value) when culture-enriched saliva samples were tested with qPCR, and the corresponding CFU/mL of *S. pneumoniae* 19A that was spiked into each raw saliva sample. Raw saliva was confirmed to be pneumococcus-negative ( $C_T > 40$ ) by qPCR towards *piaB*. Data shown as mean and standard deviation of biological triplicate data.

604 **Supplemental File - Raw Data**

605

606

607 **References**

- 608 1. CDC, C. for D. C. and P. Updated Recommendations for Prevention of Invasive  
609 Pneumococcal Disease Among Adults Using the 23-Valent Pneumococcal  
610 Polysaccharide Vaccine (PPSV23). *MMWR* **59**, 1102–1106 (2010).
- 611 2. Troeger, C. *et al.* Estimates of the global, regional, and national morbidity, mortality, and  
612 aetiologies of lower respiratory infections in 195 countries, 1990–2016: a systematic  
613 analysis for the Global Burden of Disease Study 2016. *Lancet Infect. Dis.* **18**, 1191–1210  
614 (2018).
- 615 3. Ganaie, F. *et al.* A New Pneumococcal Capsule Type, 10D, is the 100th Serotype and  
616 Has a Large *cps* Fragment from an Oral Streptococcus. *mBio* **11**, e00937-20,  
617 /mbio/11/3/mBio.00937-20.atom (2020).
- 618 4. Weinberger, D. M., Malley, R. & Lipsitch, M. Serotype replacement in disease after  
619 pneumococcal vaccination. *The Lancet* **378**, 1962–1973 (2011).
- 620 5. Nahm, M. H. *et al.* Pneumococci Can Become Virulent by Acquiring a New Capsule  
621 From Oral Streptococci. *J. Infect. Dis.* jiz456 (2019) doi:10.1093/infdis/jiz456.
- 622 6. Chochua, S. *et al.* Invasive Serotype 35B Pneumococci Including an Expanding Serotype  
623 Switch Lineage, United States, 2015–2016. *Emerg. Infect. Dis.* **23**, 922–930 (2017).
- 624 7. Moore, M. R. *et al.* Population Snapshot of Emergent *Streptococcus pneumoniae*  
625 Serotype 19A in the United States, 2005. *J. Infect. Dis.* **197**, 1016–1027 (2008).
- 626 8. Croucher, N. J. *et al.* Selective and Genetic Constraints on Pneumococcal Serotype  
627 Switching. *PLOS Genet.* **11**, e1005095 (2015).
- 628 9. Griffith, Fred. The Significance of Pneumococcal Types. *J. Hyg. (Lond.)* **27**, 113–159  
629 (1928).

- 630 10. Li, Y., Thompson, C. M. & Lipsitch, M. A Modified Janus Cassette (Sweet Janus) to  
631 Improve Allelic Replacement Efficiency by High-Stringency Negative Selection in  
632 *Streptococcus pneumoniae*. *PLoS ONE* **9**, e100510 (2014).
- 633 11. Echlin, H. & Rosch, J. W. Advancing Genetic Tools in *Streptococcus pneumoniae*. *Genes*  
634 **11**, 965 (2020).
- 635 12. Kelly, T., Dillard, J. P. & Yother, J. Effect of genetic switching of capsular type on  
636 virulence of *Streptococcus pneumoniae*. *Infect. Immun.* **62**, 1813–1819 (1994).
- 637 13. Hathaway, L. J. *et al.* Capsule Type of *Streptococcus pneumoniae* Determines Growth  
638 Phenotype. *PLoS Pathog.* **8**, e1002574 (2012).
- 639 14. Satzke, C. *et al.* Standard method for detecting upper respiratory carriage of  
640 *Streptococcus pneumoniae*: Updated recommendations from the World Health  
641 Organization Pneumococcal Carriage Working Group. *Vaccine* **32**, 165–179 (2013).
- 642 15. Krone, C. L. *et al.* Carriage of *Streptococcus pneumoniae* in Aged Adults with Influenza-  
643 Like-Illness. *PLOS ONE* **10**, e0119875 (2015).
- 644 16. Wyllie, A. L. *et al.* Molecular surveillance on *Streptococcus pneumoniae* carriage in non-  
645 elderly adults; little evidence for pneumococcal circulation independent from the  
646 reservoir in children. *Sci. Rep.* **6**, 34888 (2016).
- 647 17. Allegrucci, M. & Sauer, K. Characterization of Colony Morphology Variants Isolated  
648 from *Streptococcus pneumoniae* Biofilms. *J. Bacteriol.* **189**, 2030–2038 (2007).
- 649 18. Pimenta, F. C., Roundtree, A., Soysal, A., Bakir, M. & McGee, L. Sequential Triplex  
650 Real-Time PCR Assay for Detecting 21 Pneumococcal Capsular Serotypes That Account  
651 for a High Global Disease Burden. *J. Clin. Microbiol.* **51**, 6 (2013).
- 652 19. Wyllie, A. L. *et al.* *Streptococcus pneumoniae* in Saliva of Dutch Primary School  
653 Children. *PLOS ONE* **9**, e102045 (2014).

- 654 20. Trzciński, K. *et al.* Superiority of Trans-Oral over Trans-Nasal Sampling in Detecting  
655 *Streptococcus pneumoniae* Colonization in Adults. *PLoS ONE* **8**, e60520 (2013).
- 656 21. Geno, K. A. *et al.* Pneumococcal Capsules and Their Types: Past, Present, and Future.  
657 *Clin. Microbiol. Rev.* **28**, 871–899 (2015).
- 658 22. Cartee, R. T., Forsee, W. T., Schutzbach, J. S. & Yother, J. Mechanism of Type 3  
659 Capsular Polysaccharide Synthesis in *Streptococcus pneumoniae* \*. *J. Biol. Chem.* **275**,  
660 3907–3914 (2000).
- 661 23. Choi, E. H., Zhang, F., Lu, Y.-J. & Malley, R. Capsular Polysaccharide (CPS) Release by  
662 Serotype 3 Pneumococcal Strains Reduces the Protective Effect of Anti-Type 3 CPS  
663 Antibodies. *Clin. Vaccine Immunol.* **23**, 162–167 (2016).
- 664 24. Horácio, A. N. *et al.* Serotype 3 Remains the Leading Cause of Invasive Pneumococcal  
665 Disease in Adults in Portugal (2012–2014) Despite Continued Reductions in Other 13-  
666 Valent Conjugate Vaccine Serotypes. *Front. Microbiol.* **7**, (2016).
- 667 25. Silva-Costa, C. *et al.* Pediatric Complicated Pneumonia Caused by *Streptococcus*  
668 *pneumoniae* Serotype 3 in 13-Valent Pneumococcal Conjugate Vaccinees, Portugal,  
669 2010–2015. *Emerg. Infect. Dis.* **24**, 1307–1314 (2018).
- 670 26. Slotved, H.-C. *et al.* The incidence of invasive pneumococcal serotype 3 disease in the  
671 Danish population is not reduced by PCV-13 vaccination. *Heliyon* **2**, e00198 (2016).
- 672 27. Xu, X. *et al.* Oral cavity contains distinct niches with dynamic microbial communities.  
673 *Environ. Microbiol.* **17**, 699–710 (2015).
- 674 28. Huebner, R. E. *et al.* Lack of utility of serotyping multiple colonies for detection of  
675 simultaneous nasopharyngeal carriage of different pneumococcal serotypes. *Pediatr.*  
676 *Infect. Dis. J.* **19**, 1017–1020 (2000).
- 677
